# Supplementary material for: Diversity-decomposition relationships in forests worldwide
Source: eLife journal article supplement (doi:10.7554/elife.55813), 2020-06-26
Supplement: supp [file elife-55813-supp-v1.zip]

Archive with 10 entries (10 files):
- elife_poa_e55813_Figure_2_figure_supplement_1.pdf
- elife_poa_e55813_Figure_2_figure_supplement_2.pdf
- elife_poa_e55813_Figure_4_figure_supplement_1.pdf
- elife_poa_e55813_Figure_4_figure_supplement_2.pdf
- elife_poa_e55813_Figure_5_figure_supplement_1.pdf
- elife_poa_e55813_Supplementary_file_1.xlsx
- elife_poa_e55813_Supplementary_file_2.xlsx
- elife_poa_e55813_Supplementary_file_3.xlsx
- elife_poa_e55813_Supplementary_file_4.xlsx
- elife_poa_e55813_Transparent_Reporting_File.docx
