# Supplementary material for: Diversity-decomposition relationships in forests worldwide
Source: eLife journal article supplement (doi:10.7554/elife.55813), 2020-06-26

## Boreal

Overall (40)  
Two species (35)  
Three species (3)  
Four species (1)  
Six species (1)

## Temperate

Overall (142)  
Two species (108)  
Three species (23)  
Four species (6)  
Six species (5)

## Mediterranean

Overall (22)  
Two species (11)  
Three species (9)  
Four species (2)  
Six species (0)

## Subtropical

Overall (18)  
Two species (15)  
Three species (0)  
Four species (2)  
Six species (1)

## Tropical

Overall (62)  
Two species (27)  
Three species (6)  
Four species (23)  
Six species (6)

-0.20

-0.10

0.00

0.10

0.20

Effect size

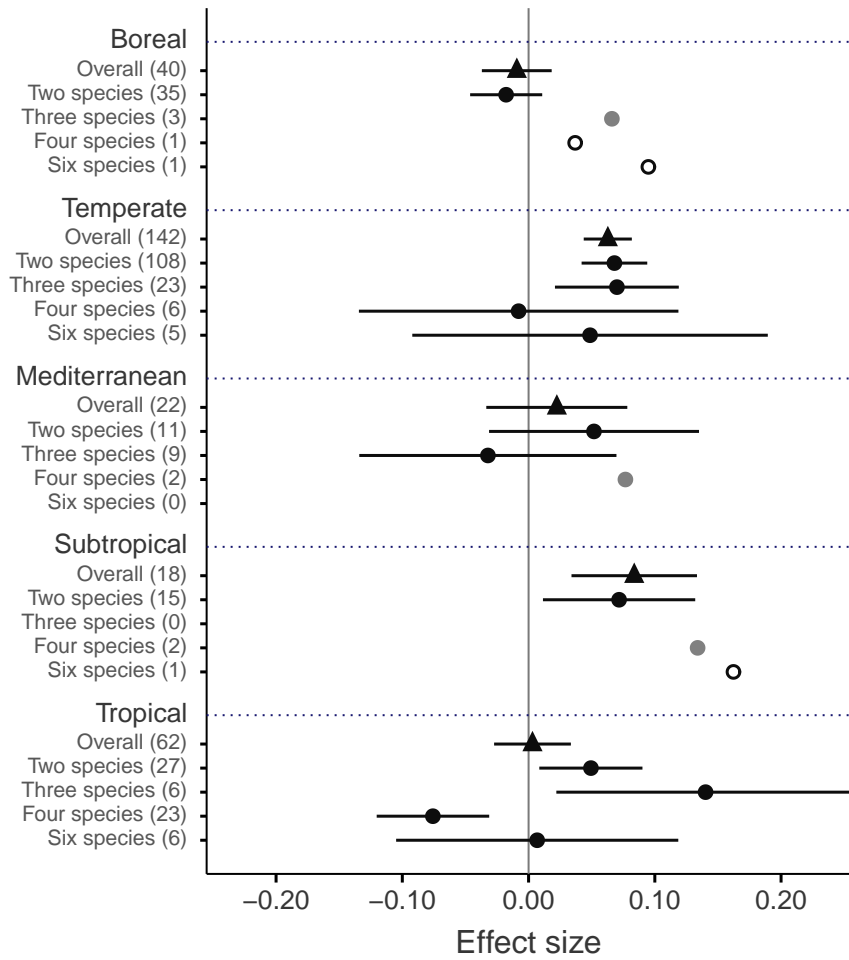

Supplement: supp [file elife-55813-supp-v1.zip › elife_poa_e55813_Figure_4_figure_supplement_1.pdf]
