# Supplementary material for: Diversity-decomposition relationships in forests worldwide
Source: eLife journal article supplement (doi:10.7554/elife.55813), 2020-06-26
Supplement: supp [file elife-55813-supp-v1.zip › elife_poa_e55813_Supplementary_file_1.xlsx]

## Sheet: Sheet1
Supplementary file 1 Location and climatic variable of studies used in the meta-analysis. Data were extracted from corresponding references or the WorldClim database.
Reference	Forest type	Longitude	Latitude	MAT (℃)	MAP (mm)
Adamidis et al. 2016	natural	26.34°E	39.04°N	13.8333	637.794
Alexander and Arther 2014	natural	83°37′W	37°51′N	12	1130
Aponte et al. 2012	natural	05°35′39″W	36°09′46″N	16.6	964
Aponte et al. 2012	natural	05°34′29″W	36°31′54″N	15.5	1470
Ashton et al. 1999	natural	100°02′-100°45′E	04°15′-05°01′N	22	4092
Aubert et al. 2010	planted	01°37′E	49°26′N	10	800
Barantal et al. 2014	natural	52°53′W	05°18′N	25.7	3041
Bastianoni et al. 2015	natural	64°30′-64°42′E	07°30′-07°44′N	27.4	1333
Berger and Berger 2012, 2014	planted	13°14′14″-15°39′54″E	47°56′21″-48°05′50″N	8.81667	1043-1180
Blair et al. 1990	natural	83°30′W	35°00′N	10.6667	1652.02
Butenschoen et al. 2014	natural	79°04′W	03°58′S	15.7	3500
Chapman et al. 2007	natural	111.66°W	35.19°N	11.9667	981.71
Chomel et al. 2016	planted	78°04′W	48°36′N	1.2	918
Cizungu et al. 2014	natural	29°00′-29°30′E	02°15′-02°55′S	15.3	1800-2500
Conn et al. 2000	natural	74°23'E	40°12'N	1.475	1121.66
De Marco et al. 2011	natural	13°33′E	40°57′N	17	599
Freita et al. 2014	natural	07°46′W	40°34′N	14.3083	324.358
Gao et al. 2015	natural	118°22′-118°37′E	41°01′-41°21′N	7.3	550
Gartner and Cardon 2006	natural	73°15′W	42°00′N	1.31667	1291.17
Giebelmann et al. 2010	natural	48.68°W	25.25°S	16.2-24.5	2000-3000
Guo K et al. 2015 (in Chinese)	natural	128°53′20″E	47°10′50″N	-0.3	676
Hansen 1999	natural	83°25′W	35°03′N	12.55	1508.25
Hickman et al. 2013	natural	73°08.9′W	40°54.3′N	11.1417	1195.58
Jiang et al. 2013	natural	128°05′E	42°24′N	3	800
Jonsson and Wardle 2008	planted	17°43′-17°55′E	65°55′-66°09′N	-0.0666667	535.432
Kaneko et al. 1999	planted	132°40′E	35°09′N	12.8083	1720.43
Li et al. 2015	natural	128°03′E	42°03′N	-6.1	1000
Li Y et al. 2012 (in Chinese)	planted	110°21′46″E	38°47′36″N	8.4	437.4
Lin KM et al. 2006 (in Chinese)	planted	118°10′E	26°40′N	18.5	1817
Liu et al. 2016	natural	105°46′39″E	26°16′01″N	15.1	1390
Luo et al. 2017	planted	106°42′E	22°10′N	21	1400
Makkonen et al. 2013	natural	18°40′E	68°21′N	1	300
Mo et al. 2006	planted	112°10′E	23°10′N	21	1927
Mudrick et al. 1994	natural	79°46′E	39°41′N	12.225	1222.25
Otsing et al. 2018	planted	21.98°E	61.71°N	6.7-6.9	567-673
Peh et al. 2012	natural	12°25′-13°35′E	02°49′-03°23′N	24.7	1512
Perez-Suarez et al. 2012	natural	101°08′-101°04′W	22°00′-22°04′N	16.5	530
Quested et al. 2005	natural	18°49′E	68°21′N	-0.2	334
Ren LN et al. 2018 (in Chinese)	natural	104.17°E	28.82°N	18.3	1114.2
Rinkes et al. 2013	natural	83°50′W	41°33′N	9.2	840
Rustad et al. 1988	natural	68°05′W	44°38′N	6	1110
Sanborn and Brockley 2009	natural	135°39′W	53°40′N	2.6	494
Santonja et al. 2015	natural	05°42′642″E	43°56′115″N	11.9	830
Sariyildiz et al. 2009	natural	41°06′E	41°51′N	4.4	1381
Schadler et al. 2005	natural	08°48′E	50°48′N	8.55	846.582
Scherer et al. 2007	planted	79°38′00″W	09°19′30″N	33.1	2350
Schuster et al. 2014	natural	87°03′15″W	40°26′47″N	10.475	78.75
Sheffer et al. 2015	planted	34°55′49″E	31°40′54″N	18.4417	480
Sohng et al. 2014	planted	127°16′45″E	38°17′16″-38°19′26″N	10.9	1371
Taylor et al. 1989	natural	115°02′W	50°02′N	-0.708333	500-800
Vivanco et al. 2011	natural	71°30′W	40°08′S	9	2300
Wang et al. 2007	planted	109°26′-110°08′E	26°40′-27°09′N	15.8	1200
Wang et al. 2008, 2009	planted	109°26′-110°08′E	26°40′-27°09′N	15.8	1200-1300
Wang et al. 2015	natural	111°45′E	36°18′N	9.9	548
Wang et al. 2018	planted	106°86′ E	22°05′ N	22.3	1300
Wu et al. 2014	planted	103°36′E	29°37′N	18	1137
Xu et al. 2012	natural	102°35′E	31°35′N	2.3	600-1100
Yang YH et al. 2011 (in Chinese)	planted	84°50′01″-84°52′11″E	45°36′33″-45°37′47″N	8.85	105
Zeng et al. 2018	planted	110°00′–111°18′ E	30°38′–31°11′ N	18	1000-1025
Zhang et al. 2008	natural	118°10′E	30°10′N	15.5	1670
Zhang Q et al. 2014 (in Chinese)	natural	127°44′-127°44′E	43°57′-43°58′N	3.8	700-800
Zhao et al. 2013	planted	122°21′E	42°58′N	6.4	450
Zhao YC et al. 2009 (in Chinese)	planted	118°09′E	27°03′N	19.4	1731.4

## Sheet: Sheet2
		longitude	latitude	elevation/m	MAT(F)	MAP(INCHES)
2007	Chapman			2965.7	41.8	34.56	32.13	49.26
2016	Adamidis	26.6	39.06	5	64.5	22.01	24.29	29.03	1998-2004
2014	Schuster et al. 2014			189	52.7	43.5	37.08	45.95	1887-1953	还没有温度数据
	杨玉申				11.5	1104.9	941.832	1167.13	1071.29
				1	17.222	25.4
				1℃=（F-32）/1.8
					5.44444	877.824	816.102	1251.2	981.71
					18.0556	559.054	616.966	737.362	637.794
					-11.3889	28064.5	23922.5	29645.1	27210.7
	Gartner			112.5	48.6	61.58	41.61	49.31		1884-1996
					9.22222	1564.13	1056.89	1252.47	1291.17
	Kaneko et al. 1999					67.2	67.6	68.4
						1706.88	1717.04	1737.36	1720.43

## Sheet: Sheet3
Ren LN et al. 2018 (in Chinese)	104.17°E	28.82°N	18.3	1114.2
Guo K et al. 2015 (in Chinese)	128°53′20″E	47°10′50″N	-0.3	676
Li Y et al. 2012 (in Chinese)	110°21′46″E	38°47′36″N	8.4	437.4
Lin KM et al. 2006 (in Chinese)	118°10′E	26°40′N	18.5	1817
Yang YH et al. 2011 (in Chinese)	84°50′01″-84°52′11″E	45°36′33″-45°37′47″N	8.85	105
Zhang Q et al. 2014 (in Chinese)	127°44′-127°44′E	43°57′-43°58′N	3.8	700-800
Zhao YC et al. 2009 (in Chinese)	118°09′E	27°03′N	19.4	1731.4
