# Supplementary material for: Diversity-decomposition relationships in forests worldwide
Source: eLife journal article supplement (doi:10.7554/elife.55813), 2020-06-26
Supplement: supp [file elife-55813-supp-v1.zip › elife_poa_e55813_Supplementary_file_2.xlsx]

## Sheet: Sheet1
Supplementary file 2 The relative and absolute N and P release from single litter species treatments and litter mixtures consisting of different number of species across all studies included in our meta-analysis.
Richness	Type	Relative nutrient release (%)								Absolute nutrient release (mg/g)
		N				P				N				P
		n	Mean	SE		n	Mean	SE		n	Mean	SE		n	Mean	SE
Two species	Single litter species	45	33.23	5.68		20	49.92	6.53		40	4.11	1.82		15	0.61	1.58
	Litter mixtures	42	41.67	5.22		13	48.27	7		34	5.02	1.43		8	0.23	0.18
Three species	Single litter species	33	7.75	10.31		21	12.32	7.33		30	1.6	1.15		18	0.19	0.12
	Litter mixtures	20	25.06	12.56		8	9.74	10.93		19	3.37	1.37		7	0.11	-0.14
Four or more species	Single litter species	12	-8.37	15.72		12	4.86	11.65		12	0.22	1.73		12	-0.02	0.07
	Litter mixtures	3	16.52	39.75		3	30.51	26.78		3	3.02	-4.28		3	0.07	0.14

## Sheet: Sheet2
Ml在10-40分类，与初始Ca关系数据，来自13个研究，44个数据条; boreal 1; 温带 5；地中海2；亚热带6；热带30个；去掉右侧异常值的15个点后，剩余点的r2=0.319，P=0.001
Ml在10-40分类，与初始Mg含量关系数据，来自11个研究，41个数据条; boreal 1; 温带 4；亚热带6；热带30个；去掉右侧异常值的15个点后，剩余点的r2=0.368，P=0.001
去掉N/P右侧6个点，r2=0.153，P=0.002
