# Supplementary material for: Diversity-decomposition relationships in forests worldwide
Source: eLife journal article supplement (doi:10.7554/elife.55813), 2020-06-26
Supplement: supp [file elife-55813-supp-v1.zip › elife_poa_e55813_Supplementary_file_3.xlsx]

## Sheet: Sheet1
Supplementary file 3 Functional type and life form of species involved in the meta-analysis.
Species	Functionl diversity	Life-form
Acer ginnala	deciduous	tree
Acer mono	deciduous	tree
Acer monspessulanum	deciduous	tree
Acer platanoides	deciduous	tree
Acer platanoides	deciduous	tree
Acer rubrum	deciduous	tree
Acer saccharum	deciduous	tree
Acosmium nitens	evergreen	tree
Alchornea glandulosa	evergreen	tree
Alchornea triplinervia	evergreen	tree
Alibertia latifolia	evergreen	tree
Alnus crispa	deciduous	tree
Alnus formosana	deciduous	tree
Alnus glutinosa	deciduous	tree
Alnus viridis	deciduous	tree
Alnus cremastogyne	deciduous	tree
Amorpha fruticos	deciduous	tree
Ampelopsis brevipedunculata	deciduous	tree
Anacardium excelsum	evergreen	tree
Betula alleganiensis	deciduous	tree
Betula ermanii	deciduous	tree
Betula nana	deciduous	tree
Betula pendula	deciduous	tree
Betula platyphylla	deciduous	tree
Betula pubescens	deciduous	tree
Betula albosinensis	deciduous	tree
Bruguiera parviflora	evergreen	tree
Cabralea canjerana	evergreen	tree
Carapa grandiflora	evergreen	tree
Carapa procera	evergreen	tree
Carpinus betulus	deciduous	tree
Carpinus pubescens	deciduous	tree
Carya glabra	deciduous	tree
Castanopsis carlesi	evergreen	tree
Castanopsis chinensis	evergreen	tree
Castanopsis eyrei	evergreen	tree
Castanopsis hystrix	evergreen	tree
Cavendishia zamorensis	evergreen	tree
Cecropia andina	evergreen	tree
Cedrela odorata	deciduous	tree
Cerasus avium	deciduous	tree
Cercis canadensis	deciduous	tree
Chinese pine	evergreen	tree
Cistus	evergreen	shrub
Cleistanthus polystachyus	evergreen	tree
Clusia spp.	evergreen	tree
Cordia alliodora	evergreen	tree
Cornus florida	deciduous	tree
Corylus avellana	deciduous	tree
Cotinus coggygria	deciduous	tree
Cryptocarya chinensis	evergreen	tree
Cunninghamia lanceolata	evergreen	tree
Cuperessus funebris	evergreen	tree
Dictyocaryum lamarckianum	evergreen	tree
Elaeagnus umbellata	deciduous	tree
Empetrum hermaphroditum	deciduous	shrub
Empetrum nigrum	deciduous	shrub
Erythrophleum fordii	evergreen	tree
Eucalyptus grandis	evergreen	tree
Fagus orientalis	deciduous	tree
Fagus sylvatica	deciduous	tree
Fraxinus excelsior	deciduous	tree
Fraxinus mandshurica	deciduous	tree
Gilbertiodendron dewevrei	evergreen	tree
Goupia glabra	evergreen	tree
Graffenrieda emarginata	evergreen	tree
Hippophae rhamnoides	deciduous	shrub
Hura crepitans	deciduous	tree
Hymenaea courbaril	evergreen	tree
Inga edulis	evergreen	tree
Itea yunnanensis	evergreen	tree
Kalopanax septemlobus	deciduous	tree
Laurus nobilis	evergreen	tree
Liriodendron tulipifera	deciduous	tree
Lithocarpus confinis	evergreen	tree
Lonicera maackii	deciduous	shrub
Luehea seemanii	evergreen	tree
Machilus cavaleriei	evergreen	tree
Machilus chinensis	evergreen	tree
Marliera tomentosa	evergreen	tree
Matayba guianensis	evergreen	tree
Michelia macclurei	evergreen	tree
Mongolian oak	deciduous	tree
Morus alba	deciduous	tree
Myrcia pubescens	evergreen	tree
Nothofagus nervosa	deciduous	tree
Nothofagus dombeyi	evergreen	tree
Nothofagus obliqua	deciduous	tree
Parinari excels	evergreen	tree
Pera glabrata	evergreen	tree
Phillyrea angustifolia	evergreen	tree
Phoeba bournei	evergreen	tree
Phyllostachys edulis	evergreen	tree
Picea abies	evergreen	tree
Picea glauca	evergreen	tree
Picea orientalis	evergreen	tree
Picea rubens	evergreen	tree
Picea asperata	evergreen	tree
Pinus cembroides	evergreen	tree
Pinus contorta	evergreen	tree
Pinus densiflora	evergreen	tree
Pinus fleilis	evergreen	tree
Pinus halepensis	evergreen	tree
Pinus koraiensis	evergreen	tree
Pinus massoniana	evergreen	tree
Pinus pinaster	evergreen	tree
Pinus rigida	evergreen	tree
Pinus strobus	evergreen	tree
Pinus sylvestris	evergreen	tree
Pinus koraiensis	evergreen	tree
Pistacia lentiscus	evergreen	shrub
Platanus!hispanica	deciduous	tree
Platonia insignis	evergreen	tree
Platycarya longipes	deciduous	tree
Ponderosa pine	evergreen	tree
Populus albavar.pyramidalis	deciduous	tree
Populus davidiana	deciduous	tree
Populus maximowiczii	deciduous	tree
Populus simonii	deciduous	tree
Populus tremuloides	deciduous	tree
Pouteria orinocoensis	evergreen	tree
Pseudotsuga menziesii	evergreen	tree
Quercus alba	deciduous	tree
Quercus aliena	deciduous	tree
Quercus calliprinos	deciduous	tree
Quercus ilex	evergreen	tree
Quercus mongolica	deciduous	tree
Quercus palustris	deciduous	tree
Quercus potosina	deciduous	tree
Quercus prinus	deciduous	tree
Quercus pubescens	deciduous	tree
Quercus robur	deciduous	tree
Quercus rubra	deciduous	tree
Quercus serrata	deciduous	tree
Quercus spp.	evergreen	tree
Quercus suber	evergreen	tree
Quercus variabilis	deciduous	tree
Quercus canariensis	deciduous	tree
Querus coccinea	deciduous	tree
Querus montana	deciduous	tree
Rhizophora apiculata	evergreen	tree
Rhizophora mucronata	evergreen	tree
Rhododendron aureum	evergreen	shrub
Robinia pseudoacacia	deciduous	tree
Rubus allegheniensis	deciduous	shrub
Rubus phoenicolasius	deciduous	shrub
Salix atrocinerea	deciduous	tree
Salix psammophila	deciduous	shrub
Sasa densidlora	deciduous	shrub
Schima superba	evergreen	tree
Simarouba amara	evergreen	tree
Sloanea guianensis	evergreen	tree
Sonneratia alba	evergreen	tree
Syzygium rehderianum	evergreen	tree
Tabebuia rosea	deciduous	tree
Tilia amurensis	deciduous	tree
Tilia tomentosa	deciduous	tree
Vaccinium myrtillus	deciduous	shrub
Vaccinium uliginosum	deciduous	shrub
Vaccinium vitis-idaea	deciduous	shrub
Vitis novae-angliae	deciduous	tree
Vochysia tomentosa	evergreen	tree
Xiaozhuanmica	deciduous	tree
Aegilops biuncialis	-	herb
Alyssum lesbiacum	-	herb
Anthriscus sylvestris	-	herb
Artemisia scoparia	-	herb
Artemisia sieversiana	-	herb
Bartsia alpina	-	herb
Cornus suecica	-	herb
Crepis commutata	-	herb
Deschampsia cespitosa	-	herb
Dicranopteris pedata	-	herb
Elymus villifer	-	herb
Hordeum bulbosum	-	herb
Lathyrus pratensis	-	herb
Matteucccia struthiopteris	-	herb
Medicago sativa	-	herb
Parasenecio komaroviam	-	herb
Plantago lagopus	-	herb
Setaria viridis	-	herb
Solidago virgaure	-	herb
Stipa bungeana	-	herb
Trifolium pratense	-	herb
