# Supplementary material for: Diversity-decomposition relationships in forests worldwide
Source: eLife journal article supplement (doi:10.7554/elife.55813), 2020-06-26
Supplement: supp [file elife-55813-supp-v1.zip › elife_poa_e55813_Supplementary_file_4.xlsx]

## Sheet: Sheet1
Supplementary file 4 Divergence in initial chemical traits among component litter species in 284 mixtures included in this study. Values are calculated based on the Eq (3) shown in materials and methods. “–“ denotes not provided values.
References	Experimental duration (month)	Number of species	N (mg/g)	P (mg/g)	K (mg/g)	Ca (mg/g)	Mg (mg/g)	Cellulose (mg/g)	Lignin (mg/g)	C/N	N/P	Lignin/N
Adamidis et al. 2016	9	3	－	－	－	－	－	－	－	－	－	－
Adamidis et al. 2016	9	2	－	－	－	－	－	－	－	－	－	－
Adamidis et al. 2016	9	4	－	－	－	－	－	－	－	－	－	－
Alexander and Arther 2014	60	3	0.147	－	－	－	－	－	14.059	3.2822	－	1.7623
Alexander and Arther 2014	60	3	0.238	－	－	－	－	－	20.488	5.3388	－	2.4419
Alexander and Arther 2014	60	3	0.272	－	－	－	－	－	19.284	6.1697	－	2.0386
Aponte et al. 2012	24	2	0.9	0.095	0.243	1.398	－	－	－	4.4	0.0725	－
Aponte et al. 2012	24	2	0.9	0.095	0.243	1.398	－	－	－	4.4	0.0725	－
Ashton et al. 1999	1.8	4	－	－	－	－	－	－	－	－	－	－
Aubert et al. 2010	12	2	0.945	－	－	－	－	－	－	2.688	－	－
Barantal et al. 2014	5	2	0.07	0.0092	－	－	－	0.1	0.3	2.7	6.725	2.5349
Barantal et al. 2014	5	2	0.0425	0.0032	－	－	－	0.675	3.675	1.675	3.6	4.8383
Barantal et al. 2014	5	2	0.025	0.0003	－	－	－	0.3	1.4	0.675	0.625	0.7326
Barantal et al. 2014	5	2	0.085	0.0013	－	－	－	0.225	0.7	1.8	1.45	1.4886
Barantal et al. 2014	5	2	0.05	0.0095	－	－	－	0.05	2.9	1.6	14.7	3.0899
Barantal et al. 2014	5	2	0.1375	0.0025	－	－	－	0.7	0.225	3.75	12.4	3.0077
Barantal et al. 2014	5	3	0.0778	0.0082	－	－	－	0.6667	2.6444	2.4	5.9778	2.3263
Barantal et al. 2014	5	3	0.1222	0.0022	－	－	－	0.6667	2.8444	3.8222	11.0222	4.9998
Barantal et al. 2014	5	3	0.0244	0.0053	－	－	－	0.7778	3	0.9111	3.3333	2.0475
Barantal et al. 2014	5	3	0.0689	0.0033	－	－	－	0.8222	1.2444	2.3333	10.2889	1.3504
Barantal et al. 2014	5	4	0.0963	0.0036	－	－	－	0.8875	2.9875	3.3937	9.425	4.4018
Barantal et al. 2014	5	4	0.1206	0.0077	－	－	－	0.575	3.0688	3.7625	12.1312	4.2392
Barantal et al. 2014	5	4	0.0719	0.0053	－	－	－	0.675	2.7062	1.7813	3.0187	2.0997
Barantal et al. 2014	5	6	0.1025	0.0066	－	－	－	0.8389	3.0861	3.1806	9.7111	4.0581
Bastianoni et al. 2015	11	3	1.4	0.042	－	－	－	－	－	3.6057	0.1872	－
Berger and Berger 2012, 2014	24	2	－	－	－	－	－	－	－	－	－	－
Berger and Berger 2012, 2014	24	2	－	－	－	－	－	－	－	－	－	－
Berger and Berger 2012, 2014	24	2	－	－	－	－	－	－	－	－	－	－
Berger and Berger 2012, 2014	24	2	－	－	－	－	－	－	－	－	－	－
Blair er al. 1990	12	2	－	－	－	－	－	－	－	－	－	－
Blair er al. 1990	12	2	－	－	－	－	－	－	－	－	－	－
Blair er al. 1990	12	3	－	－	－	－	－	－	－	－	－	－
Butenschoen et al. 2014	24	2	0.5	0.25	1.75	0	1	9.25	42.25	5.5714	0.375	0.3643
Butenschoen et al. 2014	24	2	1	0.75	6.75	40.5	4.75	30	18.25	5.7013	0.325	9.0097
Butenschoen et al. 2014	24	2	0.75	0.25	3	5	0.5	61	7.5	11.5714	0.5417	17.0357
Butenschoen et al. 2014	24	2	0.5	0.25	1.75	11.75	1	2.75	20.5	5.9214	0.4583	3.9857
Butenschoen et al. 2014	24	2	0.25	0.25	2	0	0.25	0	21.5	1.2798	0.375	0.2143
Butenschoen et al. 2014	24	2	1.5	1	5	40.5	3.75	39.25	24	11.2727	0.7	8.6455
Butenschoen et al. 2014	24	2	0.25	0.5	1.25	5	0.5	70.25	49.75	6	0.9167	17.4
Butenschoen et al. 2014	24	2	0	0.5	0	11.75	0	6.5	21.75	0.35	0.8333	4.35
Butenschoen et al. 2014	24	2	0.25	0.5	0.25	0	1.25	9.25	20.75	4.2917	0.75	0.15
Butenschoen et al. 2014	24	2	1.75	0.5	3.75	35.5	4.25	31	25.75	17.2727	0.2167	26.0455
Butenschoen et al. 2014	24	2	1.5	0.5	5	28.75	3.75	32.75	2.25	11.6227	0.1333	12.9955
Butenschoen et al. 2014	24	2	1.25	0.5	4.75	40.5	5	30	3.25	6.9811	0.05	8.7955
Butenschoen et al. 2014	24	2	0.25	0	1.25	6.75	0.5	63.75	28	5.65	0.0833	13.05
Butenschoen et al. 2014	24	2	0.5	0	1	5	0.75	61	29	10.2917	0.1667	17.25
Butenschoen et al. 2014	24	2	0.25	0	0.25	11.75	1.25	2.75	1	4.6417	0.0833	4.2
Butenschoen et al. 2014	24	4	1.437	0.813	5.375	31.625	3.688	60.187	41.875	14.3474	0.7688	19.6252
Butenschoen et al. 2014	24	4	1.25	0.813	5.062	33.312	3.563	30.125	32.25	10.1099	0.7063	9.8377
Butenschoen et al. 2014	24	4	1.187	0.813	5.125	30.375	4	29.438	32.5	8.7745	0.6437	6.7948
Butenschoen et al. 2014	24	4	0.563	0.437	2.25	10.063	0.875	53.375	42.438	8.7661	0.8021	14.0464
Butenschoen et al. 2014	24	4	0.625	0.437	2.313	3.75	1.062	52.687	42.687	9.7515	0.7813	13.1036
Butenschoen et al. 2014	24	4	0.437	0.437	1.5	8.812	1.187	7.625	31.938	5.514	0.7187	3.3161
Butenschoen et al. 2014	24	4	1.437	0.563	5.375	32.062	3.688	55.313	25.562	14.4349	0.4396	20.5305
Butenschoen et al. 2014	24	4	1.375	0.563	5.313	31.625	3.875	53.25	26.313	13.2745	0.4187	19.5877
Butenschoen et al. 2014	24	4	1.187	0.563	5.125	33.312	4	24.562	16.687	9.037	0.3562	9.8002
Butenschoen et al. 2014	24	4	0.625	0.187	2.313	10.063	1.062	47.813	26.875	9.839	0.4271	13.9339
Butenschoen et al. 2014	24	4	1.313	0.75	4.063	32.062	3.187	60.875	37.875	13.042	0.7208	20.6216
Butenschoen et al. 2014	24	4	1.375	0.75	4	31.625	3.875	60.187	38.125	14.0275	0.7	19.5716
Butenschoen et al. 2014	24	4	1.187	0.75	3.812	33.312	3.75	30.125	18.25	9.79	0.6375	9.7841
Butenschoen et al. 2014	24	4	0.375	0.375	1	10.063	1.062	53.375	37.563	7.8063	0.7083	14.1
Butenschoen et al. 2014	24	4	1.375	0.375	4	32.062	3.875	55.313	22.313	14.115	0.1833	20.5841
Chapman et al. 2007	3	2	0.05	－	－	－	－	－	26	0.125	－	3.6
Chapman et al. 2007	3	2	0.9	－	－	－	－	－	26.75	6.025	－	1.575
Chapman et al. 2007	3	2	0.9	－	－	－	－	－	15.5	6.35	－	0.5
Chapman et al. 2007	3	2	0.85	－	－	－	－	－	0.75	6.15	－	2.025
Chapman et al. 2007	3	2	0.85	－	－	－	－	－	10.5	6.475	－	3.1
Chapman et al. 2007	3	2	0	－	－	－	－	－	11.25	0.325	－	1.075
Chomel et al. 2016	24	2	0.075	－	－	－	－	－	－	2.5	－	－
Cizungu et al. 2014	12	3	1.479	1.838	0.496	2.97	0.432	7.533	31.129	1.6207	0.1262	2.5249
Conn et al. 2000	9.5	2	－	－	－	－	－	－	－	－	－	－
De Marco et al. 2011	13.4	3	0.156	－	－	－	－	22.244	24.578	7.2889	－	6.2467
De Marco et al. 2011	13.4	3	0.22	－	－	－	－	22.244	19.133	6.4978	－	6.2467
De Marco et al. 2011	13.4	3	0.213	－	－	－	－	18.769	16.144	6.5494	－	5.2706
Freita et al. 2014	12	3	0.907	0.124	－	－	－	－	－	1.5614	1.0425	－
Gao et al. 2015	12	2	0.25	0	0.275	－	－	－	2.875	2.525	0.2083	1.35
Gao et al. 2015	12	2	0.4	0.075	0.5	－	－	－	9.475	5.075	0.1458	3.125
Gao et al. 2015	12	2	0.15	0.075	0.775	－	－	－	6.6	2.55	0.3542	1.775
Gao et al. 2015	12	2	0.144	0.027	0.356	－	－	－	3.411	1.827	0.1858	1.125
Gao et al. 2015	12	2	0.336	0.063	0.684	－	－	－	7.959	4.263	0.3225	2.625
Gartner and Cardon 2006	12	2	0.348	－	－	－	－	－	33.05	4.325	－	4.345
Giebelmann et al. 2010	6	2	－	－	－	－	－	－	－	－	－	－
Giebelmann et al. 2010	6	2	－	－	－	－	－	－	－	－	－	－
Giebelmann et al. 2010	6	2	－	－	－	－	－	－	－	－	－	－
Giebelmann et al. 2010	6	2	－	－	－	－	－	－	－	－	－	－
Giebelmann et al. 2010	6	4	－	－	－	－	－	－	－	－	－	－
Giebelmann et al. 2010	6	4	－	－	－	－	－	－	－	－	－	－
Giebelmann et al. 2010	6	4	－	－	－	－	－	－	－	－	－	－
Giebelmann et al. 2010	6	4	－	－	－	－	－	－	－	－	－	－
Giebelmann et al. 2010	6	6	－	－	－	－	－	－	－	－	－	－
Giebelmann et al. 2010	6	6	－	－	－	－	－	－	－	－	－	－
Giebelmann et al. 2010	6	6	－	－	－	－	－	－	－	－	－	－
Giebelmann et al. 2010	6	6	－	－	－	－	－	－	－	－	－	－
Guo K et al. 2015 (in Chinese)	16	2	1.087	－	－	－	－	－	－	21.0188	－	－
Guo K et al. 2015 (in Chinese)	16	2	1.45	－	－	－	－	－	－	28.025	－	－
Guo K et al. 2015 (in Chinese)	16	2	1.087	－	－	－	－	－	－	21.0188	－	－
Hansen 1999	18	3	0.733	－	－	－	－	－	－	4.5538	－	－
Hickman et al. 2013	12	2	1.05	－	－	－	－	－	－	8.9075	－	－
Hickman et al. 2013	12	2	1.35	－	－	－	－	－	－	1.99	－	－
Hickman et al. 2013	12	2	1.5	－	－	－	－	－	－	2.55	－	－
Jiang et al. 2013	12	2	1.412	0.073	－	－	－	－	－	31.0618	0.7375	－
Jiang et al. 2013	12	2	2.475	0.175	－	－	－	－	－	34.6884	2.0238	－
Jiang et al. 2013	12	2	1.047	0.06	－	－	－	－	－	30.6851	1.0103	－
Jiang et al. 2013	12	4	1.948	0.134	－	－	－	－	－	26.1105	1.5861	－
Jonsson and Wardle 2008	12	3	1.253	0.184	－	－	－	－	－	－	0.7869	－
Jonsson and Wardle 2008	12	3	0.809	0.122	－	－	－	－	－	－	0.4995	－
Jonsson and Wardle 2008	12	3	0.816	0.142	－	－	－	－	－	－	0.6127	－
Jonsson and Wardle 2008	12	6	1.132	0.175	－	－	－	－	－	－	0.8302	－
Kaneko et al. 1999	24	2	0.75	－	－	－	－	13.5	53.25	22.9821	－	16.9937
Kaneko et al. 1999	24	2	1.175	－	－	－	－	2	16.25	21.55	－	9.3694
Kaneko et al. 1999	24	2	0.425	－	－	－	－	15.5	69.5	1.4321	－	7.6244
Kaneko et al. 1999	24	3	1.044	－	－	－	－	13.778	61.778	20.4285	－	15.1056
Li et al. 2015	24	2	1.15	－	－	－	－	－	－	4	－	－
Li et al. 2015	24	2	0.275	－	－	－	－	－	－	0.275	－	－
Li et al. 2015	24	3	1.022	－	－	－	－	－	－	3.8	－	－
Li Y et al. 2012 (in Chinese)	14	2	0.998	－	－	－	－	－	－	2.3875	－	－
Li Y et al. 2012 (in Chinese)	14	2	0.243	－	－	－	－	－	－	0.165	－	－
Li Y et al. 2012 (in Chinese)	14	2	2.918	－	－	－	－	－	－	9.425	－	－
Li Y et al. 2012 (in Chinese)	14	2	1.678	－	－	－	－	－	－	6.8725	－	－
Li Y et al. 2012 (in Chinese)	14	2	0.838	－	－	－	－	－	－	2.625	－	－
Li Y et al. 2012 (in Chinese)	14	2	1.898	－	－	－	－	－	－	7.4925	－	－
Li Y et al. 2012 (in Chinese)	14	2	1.082	－	－	－	－	－	－	4.4125	－	－
Li Y et al. 2012 (in Chinese)	14	2	0.022	－	－	－	－	－	－	0.455	－	－
Li Y et al. 2012 (in Chinese)	14	2	1.835	－	－	－	－	－	－	5.0125	－	－
Li Y et al. 2012 (in Chinese)	14	2	2.895	－	－	－	－	－	－	9.88	－	－
Li Y et al. 2012 (in Chinese)	14	2	0.595	－	－	－	－	－	－	2.46	－	－
Li Y et al. 2012 (in Chinese)	14	2	1.655	－	－	－	－	－	－	7.3275	－	－
Li Y et al. 2012 (in Chinese)	14	3	1.631	－	－	－	－	－	－	4.4556	－	－
Li Y et al. 2012 (in Chinese)	14	3	2.573	－	－	－	－	－	－	8.7822	－	－
Li Y et al. 2012 (in Chinese)	14	3	0.744	－	－	－	－	－	－	2.3333	－	－
Li Y et al. 2012 (in Chinese)	14	3	1.687	－	－	－	－	－	－	6.66	－	－
Li Y et al. 2012 (in Chinese)	14	3	2.593	－	－	－	－	－	－	8.3778	－	－
Li Y et al. 2012 (in Chinese)	14	3	2.593	－	－	－	－	－	－	8.7822	－	－
Li Y et al. 2012 (in Chinese)	14	3	1.491	－	－	－	－	－	－	6.1089	－	－
Li Y et al. 2012 (in Chinese)	14	3	1.491	－	－	－	－	－	－	6.5133	－	－
Lin KM et al. 2006 (in Chinese)	12	2	－	－	－	－	－	－	－	－	－	－
Lin KM et al. 2006 (in Chinese)	12	2	－	－	－	－	－	－	－	－	－	－
Lin KM et al. 2006 (in Chinese)	12	2	－	－	－	－	－	－	－	－	－	－
Liu et al. 2016	24	2	0.635	0.065	0.133	2.06	0.143	－	0.5	2.29	7.3	0.97
Liu et al. 2016	24	4	1.038	0.083	0.543	3.679	0.194	－	10.844	3.065	8.357	1.4631
Liu et al. 2016	24	6	0.917	0.071	0.541	4.769	0.283	－	13.833	2.9875	7.3499	1.4575
Luo et al. 2017	18	2	4.263	0.029	0.311	0.941	0.655	9.891	9.261	4.746	10.038	2.6292
Makkonen et al. 2013	10.5	2	－	－	－	－	－	－	－	－	－	－
Makkonen et al. 2013	10.5	2	－	－	－	－	－	－	－	－	－	－
Makkonen et al. 2013	10.5	2	－	－	－	－	－	－	－	－	－	－
Makkonen et al. 2013	10.5	2	－	－	－	－	－	－	－	－	－	－
Makkonen et al. 2013	10.5	2	－	－	－	－	－	－	－	－	－	－
Makkonen et al. 2013	10.5	2	－	－	－	－	－	－	－	－	－	－
Makkonen et al. 2013	10.5	2	－	－	－	－	－	－	－	－	－	－
Makkonen et al. 2013	10.5	2	－	－	－	－	－	－	－	－	－	－
Makkonen et al. 2013	10.5	2	－	－	－	－	－	－	－	－	－	－
Makkonen et al. 2013	10.5	2	－	－	－	－	－	－	－	－	－	－
Makkonen et al. 2013	10.5	2	－	－	－	－	－	－	－	－	－	－
Makkonen et al. 2013	10.5	2	－	－	－	－	－	－	－	－	－	－
Makkonen et al. 2013	10.5	2	－	－	－	－	－	－	－	－	－	－
Makkonen et al. 2013	10.5	2	－	－	－	－	－	－	－	－	－	－
Makkonen et al. 2013	10.5	2	－	－	－	－	－	－	－	－	－	－
Makkonen et al. 2013	10.5	2	－	－	－	－	－	－	－	－	－	－
Makkonen et al. 2013	10.5	2	－	－	－	－	－	－	－	－	－	－
Makkonen et al. 2013	10.5	2	－	－	－	－	－	－	－	－	－	－
Makkonen et al. 2013	10.5	2	－	－	－	－	－	－	－	－	－	－
Makkonen et al. 2013	10.5	2	－	－	－	－	－	－	－	－	－	－
Mo et al. 2006	18	4	1.244	0.039	－	－	－	－	－	－	1.3475	－
Mo et al. 2006	18	2	0.7	0.05	－	－	－	－	－	－	2.4428	－
Mudrick et al. 1994	12	3	－	－	－	－	－	－	－	－	－	－
Otsing et al. 2018	12	2	－	－	－	－	－	－	－	－	－	－
Otsing et al. 2018	12	2	－	－	－	－	－	－	－	－	－	－
Otsing et al. 2018	12	2	－	－	－	－	－	－	－	－	－	－
Otsing et al. 2018	12	2	－	－	－	－	－	－	－	－	－	－
Otsing et al. 2018	12	2	－	－	－	－	－	－	－	－	－	－
Otsing et al. 2018	12	2	－	－	－	－	－	－	－	－	－	－
Otsing et al. 2018	12	4	－	－	－	－	－	－	－	－	－	－
Peh et al. 2012	9	2	0.225	－	－	－	－	－	－	0.15	－	－
Perez-Suarez et al. 2012	12	2	0	0	0	0	0	0	0	0	0	0
Quested et al. 2005	24	2	2.2	0.075	－	－	－	－	－	－	1.3036	－
Quested et al. 2005	24	2	2.2	0.25	－	－	－	－	－	－	0.8839	－
Quested et al. 2005	24	2	2.175	0.225	－	－	－	－	－	－	0.2464	－
Ren LN et al. 2018 (in Chinese)	12	2	4.445	0.05	－	－	－	－	－	2.94	0.32	－
Rinkes et al. 2013	28	2	－	－	－	－	－	－	－	－	－	－
Rustad et al. 1988	24	3	0.293	－	1.052	0.154	－	－	73.992	1.1448	－	－
Sanborn and Brockley 2009	84	2	2.275	0.725	2.475	1.5	0.45	－	－	－	1.2833	－
Santonja et al. 2015	24	2	0.325	－	－	－	－	5.675	10.75	2.875	－	1
Santonja et al. 2015	24	2	0.025	－	－	－	－	23.725	26.075	1.425	－	1
Santonja et al. 2015	24	2	0.225	－	－	－	－	19.85	11	1.75	－	1.7
Santonja et al. 2015	24	2	0.3	－	－	－	－	29.4	36.825	1.45	－	0
Santonja et al. 2015	24	2	0.1	－	－	－	－	25.525	21.75	1.125	－	2.7
Santonja et al. 2015	24	2	0.2	－	－	－	－	3.875	15.075	0.325	－	2.7
Santonja et al. 2015	24	3	0.289	－	－	－	－	26.133	32.733	2.5556	－	0.8889
Santonja et al. 2015	24	3	0.289	－	－	－	－	22.689	19.333	2.5556	－	2.4
Santonja et al. 2015	24	3	0.2	－	－	－	－	21.089	23.178	1.5556	－	2.4
Santonja et al. 2015	24	3	0.267	－	－	－	－	26.133	32.733	1.2889	－	2.4
Santonja et al. 2015	24	4	0.294	－	－	－	－	27.012	30.369	2.2375	－	2.275
Sariyildiz et al. 2009	48	2	0.25	－	－	－	－	6.5	21.5	0.75	－	1
Schadler et al. 2005	8	2	1.25	－	－	－	－	－	－	4.3405	－	－
Schadler et al. 2005	8	2	1.45	－	－	－	－	－	－	3.7621	－	－
Schadler et al. 2005	8	2	1.675	－	－	－	－	－	－	5.4725	－	－
Schadler et al. 2005	8	2	0.325	－	－	－	－	－	－	0.4408	－	－
Schadler et al. 2005	8	2	0.525	－	－	－	－	－	－	2.117	－	－
Schadler et al. 2005	8	4	1.806	－	－	－	－	－	－	5.6743	－	－
Schadler et al. 2005	8	4	1.494	－	－	－	－	－	－	4.8071	－	－
Schadler et al. 2005	8	4	1.531	－	－	－	－	－	－	4.8318	－	－
Schadler et al. 2005	8	4	1.219	－	－	－	－	－	－	3.3509	－	－
Schadler et al. 2005	8	4	1.125	－	－	－	－	－	－	3.4224	－	－
Schadler et al. 2005	8	6	1.286	－	－	－	－	－	－	4.1407	－	－
Schadler et al. 2005	8	6	1.111	－	－	－	－	－	－	3.435	－	－
Schadler et al. 2005	8	6	1.461	－	－	－	－	－	－	4.7285	－	－
Schadler et al. 2005	8	6	1.417	－	－	－	－	－	－	4.2883	－	－
Schadler et al. 2005	8	6	1.444	－	－	－	－	－	－	4.15	－	－
Scherer et al. 2007	4	6	2.029	－	－	－	－	35.851	58.918	5.3428	－	8.834
Schuster et al. 2014	12	2	－	－	－	－	－	－	－	0.9188	－	－
Schuster et al. 2014	12	2	－	－	－	－	－	－	－	2.5521	－	－
Schuster et al. 2014	12	2	－	－	－	－	－	－	－	0.9188	－	－
Schuster et al. 2014	12	2	－	－	－	－	－	－	－	0.8438	－	－
Schuster et al. 2014	12	2	－	－	－	－	－	－	－	2.3438	－	－
Schuster et al. 2014	12	2	－	－	－	－	－	－	－	0.8438	－	－
Schuster et al. 2014	12	2	－	－	－	－	－	－	－	1.275	－	－
Schuster et al. 2014	12	2	－	－	－	－	－	－	－	3.5417	－	－
Schuster et al. 2014	12	2	－	－	－	－	－	－	－	1.275	－	－
Schuster et al. 2014	12	2	－	－	－	－	－	－	－	3.675	－	－
Schuster et al. 2014	12	2	－	－	－	－	－	－	－	10.2083	－	－
Schuster et al. 2014	12	2	－	－	－	－	－	－	－	3.675	－	－
Schuster et al. 2014	12	2	－	－	－	－	－	－	－	1.67	－	－
Schuster et al. 2014	12	2	－	－	－	－	－	－	－	4.6354	－	－
Schuster et al. 2014	12	2	－	－	－	－	－	－	－	1.6688	－	－
Schuster et al. 2014	12	2	－	－	－	－	－	－	－	1.5937	－	－
Schuster et al. 2014	12	2	－	－	－	－	－	－	－	4.4271	－	－
Schuster et al. 2014	12	2	－	－	－	－	－	－	－	1.5937	－	－
Schuster et al. 2014	12	2	－	－	－	－	－	－	－	0.525	－	－
Schuster et al. 2014	12	2	－	－	－	－	－	－	－	1.4583	－	－
Schuster et al. 2014	12	2	－	－	－	－	－	－	－	0.525	－	－
Schuster et al. 2014	12	2	－	－	－	－	－	－	－	2.925	－	－
Schuster et al. 2014	12	2	－	－	－	－	－	－	－	8.125	－	－
Schuster et al. 2014	12	2	－	－	－	－	－	－	－	2.925	－	－
Schuster et al. 2014	12	2	－	－	－	－	－	－	－	2.4375	－	－
Schuster et al. 2014	12	2	－	－	－	－	－	－	－	6.7709	－	－
Schuster et al. 2014	12	2	－	－	－	－	－	－	－	2.4375	－	－
Schuster et al. 2014	12	2	－	－	－	－	－	－	－	2.3625	－	－
Schuster et al. 2014	12	2	－	－	－	－	－	－	－	6.5625	－	－
Schuster et al. 2014	12	2	－	－	－	－	－	－	－	2.3625	－	－
Schuster et al. 2014	12	2	－	－	－	－	－	－	－	0.2438	－	－
Schuster et al. 2014	12	2	－	－	－	－	－	－	－	0.6771	－	－
Schuster et al. 2014	12	2	－	－	－	－	－	－	－	0.2438	－	－
Schuster et al. 2014	12	2	－	－	－	－	－	－	－	2.1562	－	－
Schuster et al. 2014	12	2	－	－	－	－	－	－	－	5.9896	－	－
Schuster et al. 2014	12	2	－	－	－	－	－	－	－	2.1562	－	－
Schuster et al. 2014	12	2	－	－	－	－	－	－	－	2.9625	－	－
Schuster et al. 2014	12	2	－	－	－	－	－	－	－	8.2292	－	－
Schuster et al. 2014	12	2	－	－	－	－	－	－	－	2.9625	－	－
Schuster et al. 2014	12	2	－	－	－	－	－	－	－	2.8875	－	－
Schuster et al. 2014	12	2	－	－	－	－	－	－	－	8.0208	－	－
Schuster et al. 2014	12	2	－	－	－	－	－	－	－	2.8875	－	－
Schuster et al. 2014	12	2	－	－	－	－	－	－	－	0.7688	－	－
Schuster et al. 2014	12	2	－	－	－	－	－	－	－	2.1354	－	－
Schuster et al. 2014	12	2	－	－	－	－	－	－	－	0.7688	－	－
Schuster et al. 2014	12	2	－	－	－	－	－	－	－	1.6313	－	－
Schuster et al. 2014	12	2	－	－	－	－	－	－	－	4.5313	－	－
Schuster et al. 2014	12	2	－	－	－	－	－	－	－	1.6313	－	－
Sheffer et al. 2015	13	2	0.46	－	－	－	－	7.408	2.602	－	－	1.2495
Sohng et al. 2014	24	2	－	－	－	－	－	－	－	－	－	－
Taylor et al. 1989	24	2	2.833	0.11	－	－	－	9.825	17.25	12.9626	1.6207	1.8972
Vivanco et al. 2011	24	3	0.467	－	0.111	0.111	0.011	－	11	4.2222	－	0.5556
Wang et al. 2007	14	2	2.1	0.017	0.875	0.5	0.225	－	－	11.25	5	－
Wang et al. 2007	14	2	1.125	0.097	0.55	1.75	0.025	－	－	8.75	1.5	－
Wang et al. 2008, 2009	20	2	1.032	0.374	0.593	1.428	0.106	－	－	2.88	7.8862	－
Wang et al. 2015	18	2	0.55	0.1	0.2	3.125	0.275	－	－	7.925	1.3	－
Wang et al. 2018	12	2	0.425	－	－	－	－	－	－	1.4	－	－
Wu et al. 2014	6	2	0.029	0.162	－	－	－	－	－	2.0452	1.1299	－
Wu et al. 2014	6	2	0.035	0.192	－	－	－	－	－	2.4348	1.3451	－
Wu et al. 2014	6	2	0.029	0.162	－	－	－	－	－	2.0452	1.1299	－
Xu et al. 2012	6	2	1.475	0.345	0.675	0.03	0.008	－	－	6.75	0.5982	－
Yang YH et al. 2011 (in Chinese)	12	2	－	－	－	－	－	－	－	－	－	－
Zeng et al. 2018	12	2	－	－	－	－	－	－	－	－	－	－
Zeng et al. 2018	12	2	－	－	－	－	－	－	－	－	－	－
Zeng et al. 2018	12	2	－	－	－	－	－	－	－	－	－	－
Zeng et al. 2018	12	3	－	－	－	－	－	－	－	－	－	－
Zhang et al. 2008	10	2	0.489	－	－	－	－	－	15.333	5	－	4.5556
Zhang et al. 2008	10	2	0.489	－	－	－	－	－	15.333	5	－	4.5556
Zhang Q et al. 2014 (in Chinese)	13	2	0.198	0.043	0.155	－	－	－	－	3.25	1.2548	－
Zhang Q et al. 2014 (in Chinese)	13	2	0.658	0.06	0.083	－	－	－	－	4.5	0.1573	－
Zhang Q et al. 2014 (in Chinese)	13	2	0.46	0.103	0.073	－	－	－	－	1.25	1.4121	－
Zhao et al. 2013	12	3	1.305	0.101	－	－	－	－	17.252	4.4325	0.947	3.91
Zhao et al. 2013	12	3	2.016	0.494	－	－	－	－	12.708	27.2875	2.8208	13.6675
Zhao YC et al. 2009 (in Chinese)	24	2	0.1	0.005	－	－	－	－	8.915	0.2725	0.483	1.22
Zhao YC et al. 2009 (in Chinese)	24	2	0.1	0.005	－	－	－	－	8.915	0.2725	0.483	1.22

## Sheet: Sheet2
Ren LN et al. 2018 (in Chinese)	12	0.586	1.778	0.02	－	11.76	1.28	－
Guo K et al. 2015 (in Chinese)	16	8	0.58	－	－	112.1	－	－
Guo K et al. 2015 (in Chinese)	16	8	0.58	－	－	112.1	－	－
Guo K et al. 2015 (in Chinese)	16	8	0.58	－	－	112.1	－	－
Zhang Q et al. 2014 (in Chinese)	13	11.466	0.079	0.017	－	13	5.0192	－
Zhang Q et al. 2014 (in Chinese)	13	11.085	0.263	0.024	－	18	0.6291	－
Zhang Q et al. 2014 (in Chinese)	13	0.381	0.184	0.041	－	5	5.6483	－
Li Y et al. 2012 (in Chinese)	14	6.985	0.399	－	－	9.55	－	－
Li Y et al. 2012 (in Chinese)	14	1.714	0.097	－	－	0.66	－	－
Li Y et al. 2012 (in Chinese)	14	5.79	1.167	－	－	37.7	－	－
Li Y et al. 2012 (in Chinese)	14	0.519	0.671	－	－	27.49	－	－
Li Y et al. 2012 (in Chinese)	14	2.797	0.335	－	－	10.5	－	－
Li Y et al. 2012 (in Chinese)	14	0.587	0.759	－	－	29.97	－	－
Li Y et al. 2012 (in Chinese)	14	3.992	0.433	－	－	17.65	－	－
Li Y et al. 2012 (in Chinese)	14	1.782	0.009	－	－	1.82	－	－
Li Y et al. 2012 (in Chinese)	14	9.782	0.734	－	－	20.05	－	－
Li Y et al. 2012 (in Chinese)	14	7.572	1.158	－	－	39.52	－	－
Li Y et al. 2012 (in Chinese)	14	4.511	0.238	－	－	9.84	－	－
Li Y et al. 2012 (in Chinese)	14	2.301	0.662	－	－	29.31	－	－
Li Y et al. 2012 (in Chinese)	14	6.5213	0.4893	－	－	13.3667	－	－
Li Y et al. 2012 (in Chinese)	14	5.048	0.772	－	－	26.3467	－	－
Li Y et al. 2012 (in Chinese)	14	3.0073	0.2233	－	－	7	－	－
Li Y et al. 2012 (in Chinese)	14	1.534	0.506	－	－	19.98	－	－
Li Y et al. 2012 (in Chinese)	14	6.5213	0.778	－	－	25.1333	－	－
Li Y et al. 2012 (in Chinese)	14	5.048	0.778	－	－	26.3467	－	－
Li Y et al. 2012 (in Chinese)	14	3.0073	0.4473	－	－	18.3267	－	－
Li Y et al. 2012 (in Chinese)	14	1.534	0.4473	－	－	19.54	－	－
Zhao YC et al. 2009 (in Chinese)	24	1.1	0.04	0.002	3.566	1.09	1.9318	4.88
Zhao YC et al. 2009 (in Chinese)	24	1.1	0.04	0.002	3.566	1.09	1.9318	4.88
Yang YH et al. 2011 (in Chinese)	12	－	－	－	－	－	－	－
Lin KM et al. 2006 (in Chinese)	12	－	－	－	－	－	－	－
Lin KM et al. 2006 (in Chinese)	12	－	－	－	－	－	－	－
Lin KM et al. 2006 (in Chinese)	12	－	－	－	－	－	－	－

## Sheet: Sheet3
Reference	initial C %	initial N %	initial P %	initial lignin %	initial C/N	initial N/P	initial lignin/N	initial K %	initial Ca %	initial Mg %	cellulose %
Adamidis et al. 2016	－	－	－	－	－	－	－	－	－	－	－
Adamidis et al. 2016	－	－	－	－	－	－	－	－	－	－	－
Adamidis et al. 2016	－	－	－	－	－	－	－	－	－	－	－
Alexander	0.1947	0.0147	－	1.4059	3.2822	－	1.7623	－	－	－	－
Alexander	0.3337	0.0238	－	2.0488	5.3388	－	2.4419	－	－	－	－
Alexander	0.4172	0.0272	－	1.9284	6.1697	－	2.0386	－	－	－	－
Aponte et al. 2012	0.5875	0.0900	0.0095	－	4.4000	0.0725	－	0.0243	0.1398	－	－
Aponte et al. 2012	0.5875	0.0900	0.0095	－	4.4000	0.0725	－	0.0243	0.1398	－	－
Ashton et al. 1999	－	－	－	－	－	－	－	－	－	－	－
Aubert	0.1953	0.0945	－	－	2.6880	－	－	－	－	－	－
Basrianoni	1.0582	0.1400	0.0042	－	3.6057	0.1872	－	－	－	－	－
Berger and Berger 2014	－	－	－	－	－	－	－	－	－	－	－
Berger and Berger 2014	－	－	－	－	－	－	－	－	－	－	－
Berger and Berger 2014	－	－	－	－	－	－	－	－	－	－	－
Berger and Berger 2014	－	－	－	－	－	－	－	－	－	－	－
Blair er al. 1990	－	－	－	－	－	－	－	－	－	－	－
Blair er al. 1990	－	－	－	－	－	－	－	－	－	－	－
Blair er al. 1990	－	－	－	－	－	－	－	－	－	－	－
Butenschoen et al.2014	0.2000	0.0500	0.0250	4.2250	5.5714	0.3750	0.3643	0.1750	0.0000	0.1000	0.9250
Butenschoen et al.2014	0.3000	0.1000	0.0750	1.8250	5.7013	0.3250	9.0097	0.6750	4.0500	0.4750	3.0000
Butenschoen et al.2014	0.1500	0.0750	0.0250	0.7500	11.5714	0.5417	17.0357	0.3000	0.5000	0.0500	6.1000
Butenschoen et al.2014	0.0250	0.0500	0.0250	2.0500	5.9214	0.4583	3.9857	0.1750	1.1750	0.1000	0.2750
Butenschoen et al.2014	0.7250	0.0250	0.0250	2.1500	1.2798	0.3750	0.2143	0.2000	0.0000	0.0250	0.0000
Butenschoen et al.2014	0.1000	0.1500	0.1000	2.4000	11.2727	0.7000	8.6455	0.5000	4.0500	0.3750	3.9250
Butenschoen et al.2014	0.3500	0.0250	0.0500	4.9750	6.0000	0.9167	17.4000	0.1250	0.5000	0.0500	7.0250
Butenschoen et al.2014	0.1750	0.0000	0.0500	2.1750	0.3500	0.8333	4.3500	0.0000	1.1750	0.0000	0.6500
Butenschoen et al.2014	0.5250	0.0250	0.0500	2.0750	4.2917	0.7500	0.1500	0.0250	0.0000	0.1250	0.9250
Butenschoen et al.2014	0.4500	0.1750	0.0500	2.5750	17.2727	0.2167	26.0455	0.3750	3.5500	0.4250	3.1000
Butenschoen et al.2014	0.2750	0.1500	0.0500	0.2250	11.6227	0.1333	12.9955	0.5000	2.8750	0.3750	3.2750
Butenschoen et al.2014	0.4250	0.1250	0.0500	0.3250	6.9811	0.0500	8.7955	0.4750	4.0500	0.5000	3.0000
Butenschoen et al.2014	0.1750	0.0250	0.0000	2.8000	5.6500	0.0833	13.0500	0.1250	0.6750	0.0500	6.3750
Butenschoen et al.2014	0.8750	0.0500	0.0000	2.9000	10.2917	0.1667	17.2500	0.1000	0.5000	0.0750	6.1000
Butenschoen et al.2014	0.7000	0.0250	0.0000	0.1000	4.6417	0.0833	4.2000	0.0250	1.1750	0.1250	0.2750
Butenschoen et al.2014	0.3875	0.1437	0.0813	4.1875	14.3474	0.7688	19.6252	0.5375	3.1625	0.3688	6.0187
Butenschoen et al.2014	0.2687	0.1250	0.0813	3.2250	10.1099	0.7063	9.8377	0.5062	3.3312	0.3563	3.0125
Butenschoen et al.2014	0.5687	0.1187	0.0813	3.2500	8.7745	0.6437	6.7948	0.5125	3.0375	0.4000	2.9438
Butenschoen et al.2014	0.2687	0.0563	0.0437	4.2438	8.7661	0.8021	14.0464	0.2250	1.0063	0.0875	5.3375
Butenschoen et al.2014	0.7063	0.0625	0.0437	4.2687	9.7515	0.7813	13.1036	0.2313	0.3750	0.1062	5.2687
Butenschoen et al.2014	0.5875	0.0437	0.0437	3.1938	5.5140	0.7187	3.3161	0.1500	0.8812	0.1187	0.7625
Butenschoen et al.2014	0.3438	0.1437	0.0563	2.5562	14.4349	0.4396	20.5305	0.5375	3.2062	0.3688	5.5313
Butenschoen et al.2014	0.7312	0.1375	0.0563	2.6313	13.2745	0.4187	19.5877	0.5313	3.1625	0.3875	5.3250
Butenschoen et al.2014	0.6125	0.1187	0.0563	1.6687	9.0370	0.3562	9.8002	0.5125	3.3312	0.4000	2.4562
Butenschoen et al.2014	0.6625	0.0625	0.0187	2.6875	9.8390	0.4271	13.9339	0.2313	1.0063	0.1062	4.7813
Butenschoen et al.2014	0.3812	0.1313	0.0750	3.7875	13.0420	0.7208	20.6216	0.4063	3.2062	0.3187	6.0875
Butenschoen et al.2014	0.6813	0.1375	0.0750	3.8125	14.0275	0.7000	19.5716	0.4000	3.1625	0.3875	6.0187
Butenschoen et al.2014	0.5500	0.1187	0.0750	1.8250	9.7900	0.6375	9.7841	0.3812	3.3312	0.3750	3.0125
Butenschoen et al.2014	0.7000	0.0375	0.0375	3.7563	7.8063	0.7083	14.1000	0.1000	1.0063	0.1062	5.3375
Butenschoen et al.2014	0.7250	0.1375	0.0375	2.2313	14.1150	0.1833	20.5841	0.4000	3.2062	0.3875	5.5313
Chapman et al. 2007	0.4415	0.0050	－	2.6000	0.1250	－	3.6000	－	－	－	－
Chapman et al. 2007	0.1060	0.0900	－	2.6750	6.0250	－	1.5750	－	－	－	－
Chapman et al. 2007	0.2320	0.0900	－	1.5500	6.3500	－	0.5000	－	－	－	－
Chapman et al. 2007	0.3355	0.0850	－	0.0750	6.1500	－	2.0250	－	－	－	－
Chapman et al. 2007	0.6735	0.0850	－	1.0500	6.4750	－	3.1000	－	－	－	－
Chapman et al. 2007	0.3380	0.0000	－	1.1250	0.3250	－	1.0750	－	－	－	－
Chomel et al. 2016	1.1000	0.0075	－	－	2.5000	－	－	－	－	－	－
Cizungu et al. 2014	0.6370	0.1479	0.1838	3.1129	1.6207	0.1262	2.5249	0.0496	0.2970	0.0432	0.7533
Conn et al. 2000	－	0.0330	0.8750	－	－	0.1016	－	－	－	－	－
De Marco et al. 2011	1.6058	0.0156	－	2.4578	7.2889	－	6.2467	－	－	－	2.2244
De Marco et al. 2011	0.5498	0.0220	－	1.9133	6.4978	－	6.2467	－	－	－	2.2244
De Marco et al. 2011	0.4639	0.0213	－	1.6144	6.5494	－	5.2706	－	－	－	1.8769
Freita et al. 2014	2.8222	0.0907	0.0124	－	1.5614	1.0425	－	－	－	－	－
Gao et al. 2015	0.4525	0.0250	0.0000	0.2875	2.5250	0.2083	1.3500	0.0275	－	－	－
Gao et al. 2015	1.0600	0.0400	0.0075	0.9475	5.0750	0.1458	3.1250	0.0500	－	－	－
Gao et al. 2015	0.6075	0.0150	0.0075	0.6600	2.5500	0.3542	1.7750	0.0775	－	－	－
Gao et al. 2015	0.3816	0.0144	0.0027	0.3411	1.8270	0.1858	1.1250	0.0356	－	－	－
Gao et al. 2015	0.8904	0.0336	0.0063	0.7959	4.2630	0.3225	2.6250	0.0684	－	－	－
Gartner et al. 2006	1.0009	0.0348	－	3.3050	4.3250	－	4.3450	－	－	－	－
Giebelmann et al. 2010	－	－	－	－	－	－	－	－	－	－	－
Giebelmann et al. 2010	－	－	－	－	－	－	－	－	－	－	－
Giebelmann et al. 2010	－	－	－	－	－	－	－	－	－	－	－
Giebelmann et al. 2010	－	－	－	－	－	－	－	－	－	－	－
Giebelmann et al. 2010	－	－	－	－	－	－	－	－	－	－	－
Giebelmann et al. 2010	－	－	－	－	－	－	－	－	－	－	－
Giebelmann et al. 2010	－	－	－	－	－	－	－	－	－	－	－
Giebelmann et al. 2010	－	－	－	－	－	－	－	－	－	－	－
Giebelmann et al. 2010	－	－	－	－	－	－	－	－	－	－	－
Giebelmann et al. 2010	－	－	－	－	－	－	－	－	－	－	－
Giebelmann et al. 2010	－	－	－	－	－	－	－	－	－	－	－
Giebelmann et al. 2010	－	－	－	－	－	－	－	－	－	－	－
Guo K et al. 2015 (in Chinese)	1.5000	0.1087	－	－	21.0188	－	－	－	－	－	－
Guo K et al. 2015 (in Chinese)	2.0000	0.1450	－	－	28.0250	－	－	－	－	－	－
Guo K et al. 2015 (in Chinese)	1.5000	0.1087	－	－	21.0188	－	－	－	－	－	－
Hansen 1999	0.3622	0.0733			4.5538
Hickman et al. 2013	0.7222	0.1050			8.9075
Hickman et al. 2013	0.0407	0.1350			1.9900
Hickman et al. 2013	0.3630	0.1500			2.5500
Jiang et al. 2013	3.9945	0.1412	0.0073		31.0618	0.7375
Jiang et al. 2013	3.9970	0.2475	0.0175		34.6884	2.0238
Jiang et al. 2013	5.3595	0.1047	0.0060		30.6851	1.0103
Jiang et al. 2013	4.0202	0.1948	0.0134		26.1105	1.5861
Jonsson et al. 2008		0.1253	0.0184			0.7869
Jonsson et al. 2008		0.0809	0.0122			0.4995
Jonsson et al. 2008		0.0816	0.0142			0.6127
Jonsson et al. 2008		0.1132	0.0175			0.8302
Kaneko et al. 1999	4.3250	0.0750		5.3250	22.9821		16.9937				1.3500
Kaneko et al. 1999	1.2250	0.1175		1.6250	21.5500		9.3694				0.2000
Kaneko et al. 1999	3.1000	0.0425		6.9500	1.4321		7.6244				1.5500
Kaneko et al. 1999	3.8444	0.1044		6.1778	20.4285		15.1056				1.3778
Li et al. 2015	1.5000	0.1150			4.0000
Li et al. 2015	1.5250	0.0275			0.2750
Li et al. 2015	2.6889	0.1022			3.8000
Li Y et al. 2012 (in Chinese)	1.7462	0.0998			2.3875
Li Y et al. 2012 (in Chinese)	0.4285	0.0243			0.1650
Li Y et al. 2012 (in Chinese)	1.4475	0.2918			9.4250
Li Y et al. 2012 (in Chinese)	0.1298	0.1678			6.8725
Li Y et al. 2012 (in Chinese)	0.6993	0.0838			2.6250
Li Y et al. 2012 (in Chinese)	0.1467	0.1898			7.4925
Li Y et al. 2012 (in Chinese)	0.9980	0.1082			4.4125
Li Y et al. 2012 (in Chinese)	0.4455	0.0022			0.4550
Li Y et al. 2012 (in Chinese)	2.4455	0.1835			5.0125
Li Y et al. 2012 (in Chinese)	1.8930	0.2895			9.8800
Li Y et al. 2012 (in Chinese)	1.1278	0.0595			2.4600
Li Y et al. 2012 (in Chinese)	0.5753	0.1655			7.3275
Li Y et al. 2012 (in Chinese)	2.1738	0.1631			4.4556
Li Y et al. 2012 (in Chinese)	1.6827	0.2573			8.7822
Li Y et al. 2012 (in Chinese)	1.0024	0.0744			2.3333
Li Y et al. 2012 (in Chinese)	0.5113	0.1687			6.6600
Li Y et al. 2012 (in Chinese)	2.1738	0.2593			8.3778
Li Y et al. 2012 (in Chinese)	1.6827	0.2593			8.7822
Li Y et al. 2012 (in Chinese)	1.0024	0.1491			6.1089
Li Y et al. 2012 (in Chinese)	0.5113	0.1491			6.5133
Lin KM et al. 2006 (in Chinese)
Lin KM et al. 2006 (in Chinese)
Lin KM et al. 2006 (in Chinese)
Liu et al. 2016	1.1467	0.0635	0.0065	0.0500	2.2900	7.3000	0.9700	0.0133	0.2060	0.0143
Liu et al. 2016	1.2523	0.1038	0.0083	1.0844	3.0650	8.3570	1.4631	0.0543	0.3679	0.0194
Liu et al. 2016	1.6160	0.0917	0.0071	1.3833	2.9875	7.3499	1.4575	0.0541	0.4769	0.0283
Luo et al. 2017	0.5481	0.4263	0.0029	0.9261	4.7460	10.0380	2.6292	0.0311	0.0941	0.0655	0.9891
Makkonen et al. 2013
Makkonen et al. 2013
Makkonen et al. 2013
Makkonen et al. 2013
Makkonen et al. 2013
Makkonen et al. 2013
Makkonen et al. 2013
Makkonen et al. 2013
Makkonen et al. 2013
Makkonen et al. 2013
Makkonen et al. 2013
Makkonen et al. 2013
Makkonen et al. 2013
Makkonen et al. 2013
Makkonen et al. 2013
Makkonen et al. 2013
Makkonen et al. 2013
Makkonen et al. 2013
Makkonen et al. 2013
Makkonen et al. 2013
Mo et al. 2006		0.1244	0.0039			1.3475
Mo et al. 2006		0.0700	0.0050			2.4428
Mudrick et al. 19994
Otsing et al. 2018
Otsing et al. 2018
Otsing et al. 2018
Otsing et al. 2018
Otsing et al. 2018
Otsing et al. 2018
Otsing et al. 2018
Peh et al. 2012	0.3450	0.0225			0.1500
Perez-Suarez et al. 2012	0.0000	0.0000	0.0000	0.0000	0.0000	0.0000	0.0000	0.0000	0.0000	0.0000	0.0000
Quested et al. 2005		0.2200	0.0075			1.3036
Quested et al. 2005		0.2200	0.0250			0.8839
Quested et al. 2005		0.2175	0.0225			0.2464
Ren LN et al. 2018 (in Chinese)	0.1465	0.4445	0.0050		2.9400	0.3200
Rinkes et al. 2013
Rustad et al. 1988	0.0800	0.0293		7.3992	1.1448			0.1052	0.0154
Sanborn and Brockley 2009		0.2275	0.0725			1.2833		0.2475	0.1500	0.0450
Santonja et al. 2015	0.1475	0.0325		1.0750	2.8750		1.0000				0.5675
Santonja et al. 2015	1.0200	0.0025		2.6075	1.4250		1.0000				2.3725
Santonja et al. 2015	0.1125	0.0225		1.1000	1.7500		1.7000				1.9850
Santonja et al. 2015	0.8725	0.0300		3.6825	1.4500		0.0000				2.9400
Santonja et al. 2015	0.0350	0.0100		2.1750	1.1250		2.7000				2.5525
Santonja et al. 2015	0.9075	0.0200		1.5075	0.3250		2.7000				0.3875
Santonja et al. 2015	0.9067	0.0289		3.2733	2.5556		0.8889				2.6133
Santonja et al. 2015	0.1311	0.0289		1.9333	2.5556		2.4000				2.2689
Santonja et al. 2015	0.9067	0.0200		2.3178	1.5556		2.4000				2.1089
Santonja et al. 2015	0.8067	0.0267		3.2733	1.2889		2.4000				2.6133
Santonja et al. 2015	0.7738	0.0294		3.0369	2.2375		2.2750				2.7012
Sariyildiz et al. 2009	0.0250		2.1500	0.7500		1.0000				0.6500
Schadler et al. 2005	0.0750	0.1250			4.3405
Schadler et al. 2005	0.4500	0.1450			3.7621
Schadler et al. 2005	1.3000	0.1675			5.4725
Schadler et al. 2005	0.8500	0.0325			0.4408
Schadler et al. 2005	0.8500	0.0525			2.1170
Schadler et al. 2005	0.6687	0.1806			5.6743
Schadler et al. 2005	0.3312	0.1494			4.8071
Schadler et al. 2005	1.1000	0.1531			4.8318
Schadler et al. 2005	1.0250	0.1219			3.3509
Schadler et al. 2005	1.0500	0.1125			3.4224
Schadler et al. 2005	0.5028	0.1286			4.1407
Schadler et al. 2005	0.8972	0.1111			3.4350
Schadler et al. 2005	1.2917	0.1461			4.7285
Schadler et al. 2005	0.6722	0.1417			4.2883
Schadler et al. 2005	1.2389	0.1444			4.1500
Scherer et al. 2007	1.0120	0.2029		5.8918	5.3428		8.8340				3.5851
Schuster et al. 2014					0.9188
Schuster et al. 2014					2.5521
Schuster et al. 2014					0.9188
Schuster et al. 2014					0.8438
Schuster et al. 2014					2.3438
Schuster et al. 2014					0.8438
Schuster et al. 2014					1.2750
Schuster et al. 2014					3.5417
Schuster et al. 2014					1.2750
Schuster et al. 2014					3.6750
Schuster et al. 2014					10.2083
Schuster et al. 2014					3.6750
Schuster et al. 2014					1.67
Schuster et al. 2014					4.6354
Schuster et al. 2014					1.6688
Schuster et al. 2014					1.5937
Schuster et al. 2014					4.4271
Schuster et al. 2014					1.5937
Schuster et al. 2014					0.5250
Schuster et al. 2014					1.4583
Schuster et al. 2014					0.5250
Schuster et al. 2014					2.9250
Schuster et al. 2014					8.1250
Schuster et al. 2014					2.9250
Schuster et al. 2014					2.4375
Schuster et al. 2014					6.7709
Schuster et al. 2014					2.4375
Schuster et al. 2014					2.3625
Schuster et al. 2014					6.5625
Schuster et al. 2014					2.3625
Schuster et al. 2014					0.2438
Schuster et al. 2014					0.6771
Schuster et al. 2014					0.2438
Schuster et al. 2014					2.1562
Schuster et al. 2014					5.9896
Schuster et al. 2014					2.1562
Schuster et al. 2014					2.9625
Schuster et al. 2014					8.2292
Schuster et al. 2014					2.9625
Schuster et al. 2014					2.8875
Schuster et al. 2014					8.0208
Schuster et al. 2014					2.8875
Schuster et al. 2014					0.7688
Schuster et al. 2014					2.1354
Schuster et al. 2014					0.7688
Schuster et al. 2014					1.6313
Schuster et al. 2014					4.5313
Schuster et al. 2014					1.6313
Sheffer et al. 2015		0.0460		0.2602			1.2495				0.7408
Sohng et al. 2014
Taylor et al. 1989	0.2225	0.2833	0.0110	1.7250	12.9626	1.6207	1.8972				0.9825
Vivanco et al. 2011	0.0000	0.0467		1.1000	4.2222		0.5556	0.0111	0.0111	0.0011
Wang et al. 2007	0.1500	0.2100	0.0017		11.2500	5.0000		0.0875	0.0500	0.0225
Wang et al. 2007	0.4500	0.1125	0.0097		8.7500	1.5000		0.0550	0.1750	0.0025
Wang et al. 2008, 09	0.7680	0.1032	0.0374		2.8800	7.8862		0.0593	0.1428	0.0106
Wang et al. 2015	2.4850	0.0550	0.0100		7.9250	1.3000		0.0200	0.3125	0.0275
Wang et al. 2018	0.9450	0.0425			1.4000
Wu et al. 2014	1.6097	0.0029	0.0162		2.0452	1.1299
Wu et al. 2014	1.9163	0.0035	0.0192		2.4348	1.3451
Wu et al. 2014	1.6097	0.0029	0.0162		2.0452	1.1299
Xu et al. 2012	0.6675	0.1475	0.0345		6.7500	0.5982		0.0675	0.0030	0.0008
Yang YH et al. 2011 (in Chinese)
Zeng et al. 2018
Zeng et al. 2018
Zeng et al. 2018
Zeng et al. 2018
Zhang peng et al. 2008	0.9556	0.0489		1.5333	5.0000		4.5556
Zhang peng et al. 2008	0.9556	0.0489		1.5333	5.0000		4.5556
Zhang Q et al. 2014 (in Chinese)	2.8665	0.0198	0.0043		3.2500	1.2548		0.0155
Zhang Q et al. 2014 (in Chinese)	2.7712	0.0658	0.0060		4.5000	0.1573		0.0083
Zhang Q et al. 2014 (in Chinese)	0.0953	0.0460	0.0103		1.2500	1.4121		0.0073
zhao et al. 2013	1.0760	0.1305	0.0101	1.7252	4.4325	0.9470	3.9100
zhao et al. 2013	2.4855	0.2016	0.0494	1.2708	27.2875	2.8208	13.6675
Zhao YC et al. 2009 (in Chinese)	0.2750	0.0100	0.0005	0.8915	0.2725	0.4830	1.2200
Zhao YC et al. 2009 (in Chinese)	0.2750	0.0100	0.0005	0.8915	0.2725	0.4830	1.2200
