# Supplementary figures and images for: Diversity-decomposition relationships in forests worldwide
Source: eLife journal article supplement (doi:10.7554/elife.55813), 2020-06-26

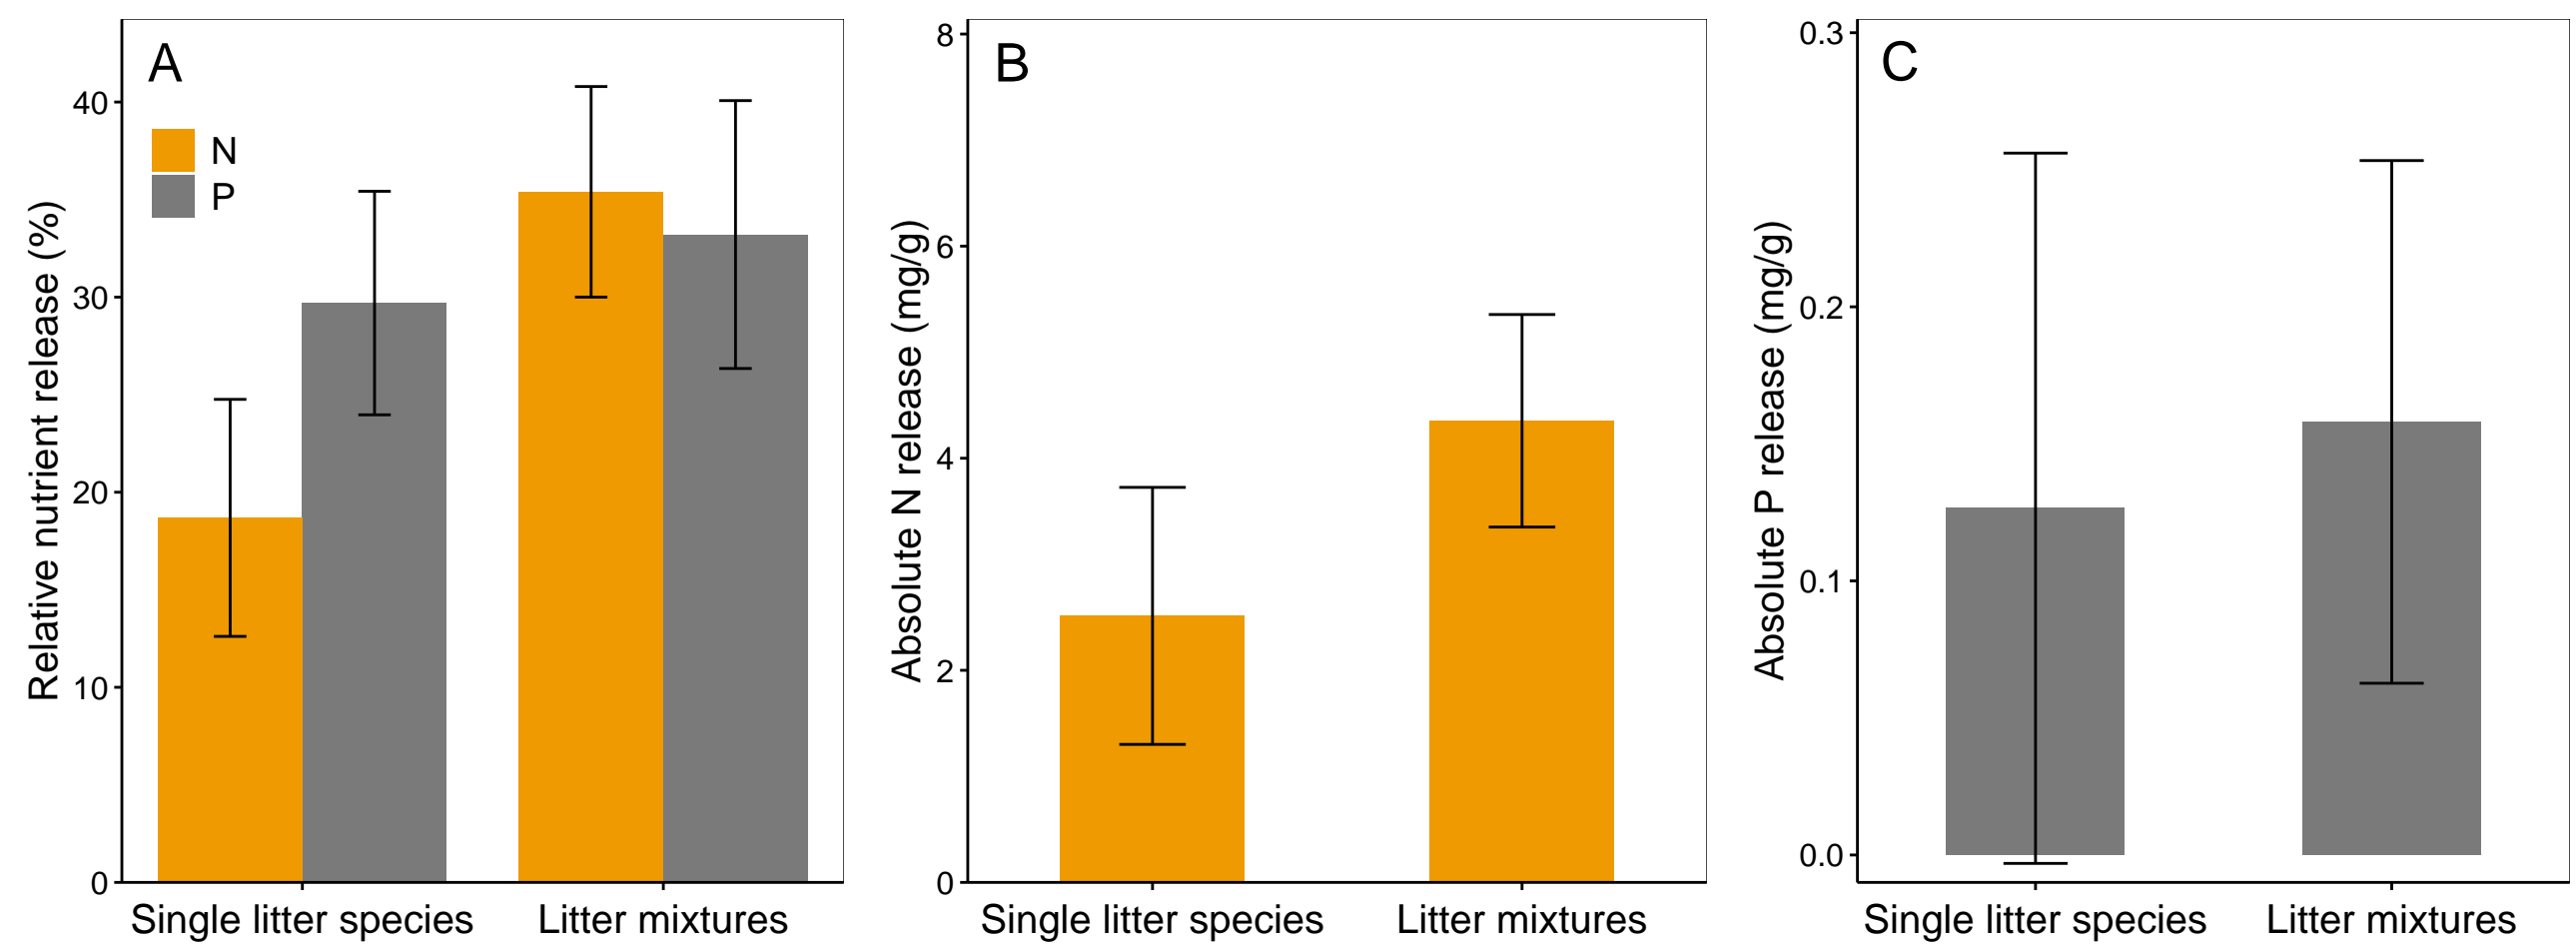

Supplement: supp [file elife-55813-supp-v1.zip]

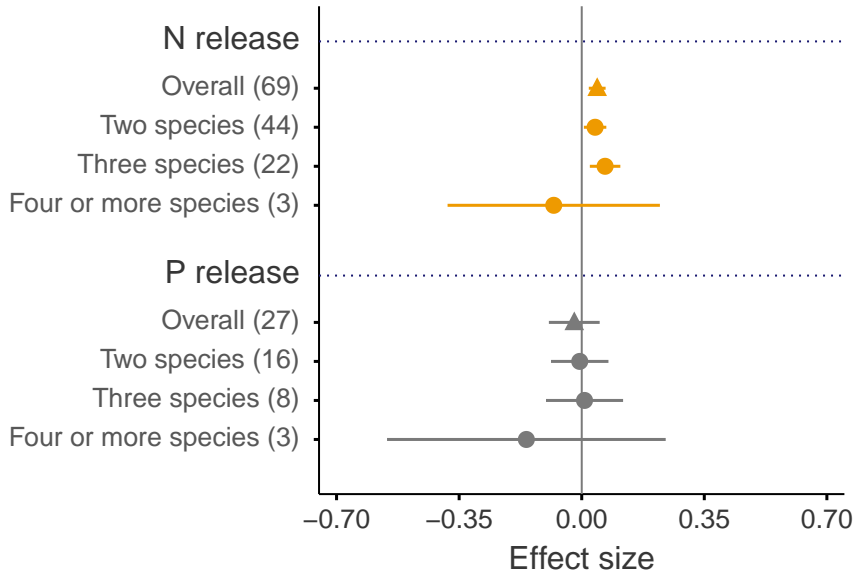

Supplement: supp [file elife-55813-supp-v1.zip › elife_poa_e55813_Figure_2_figure_supplement_2.pdf]

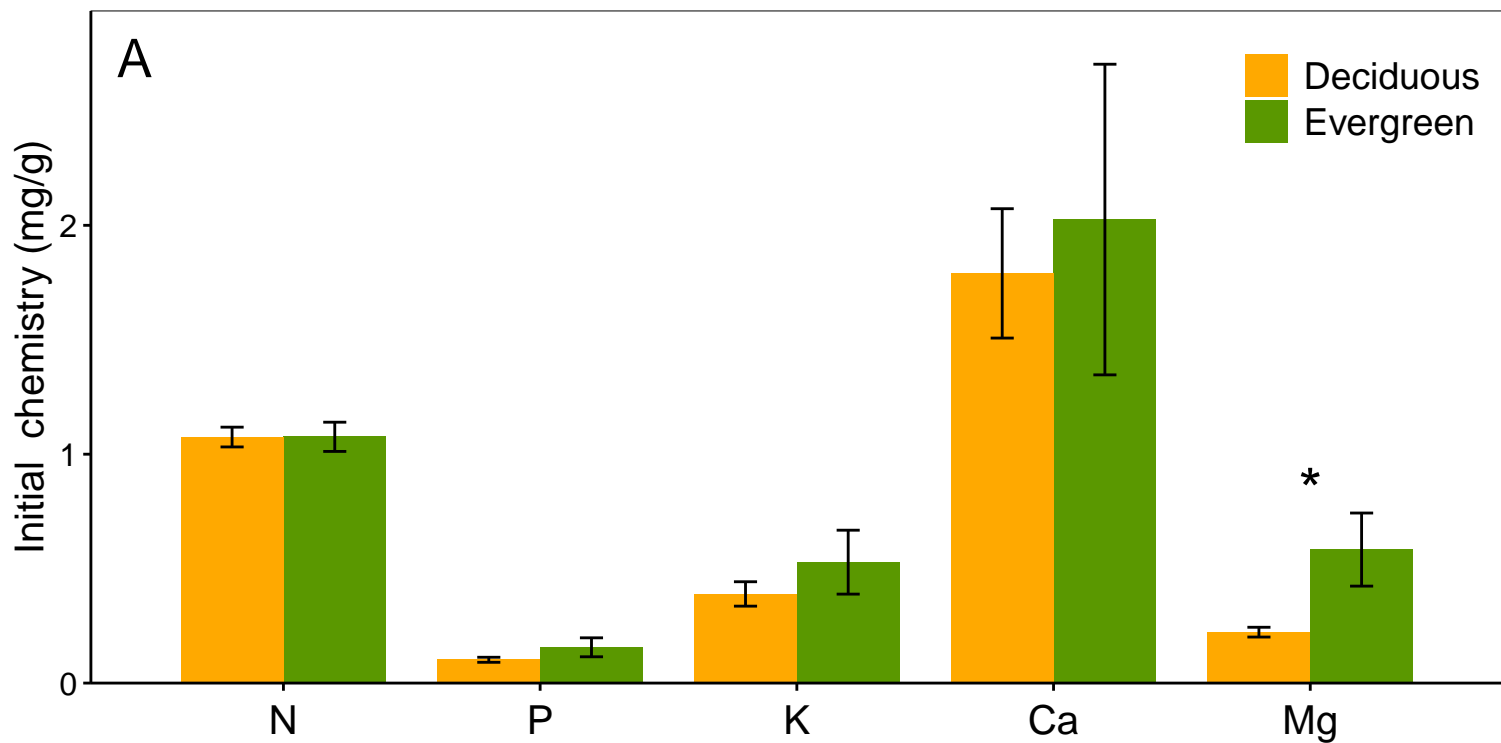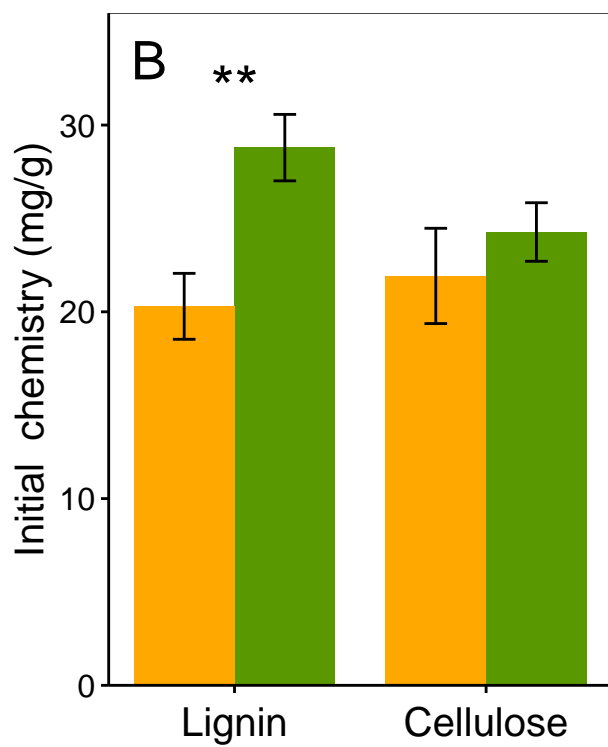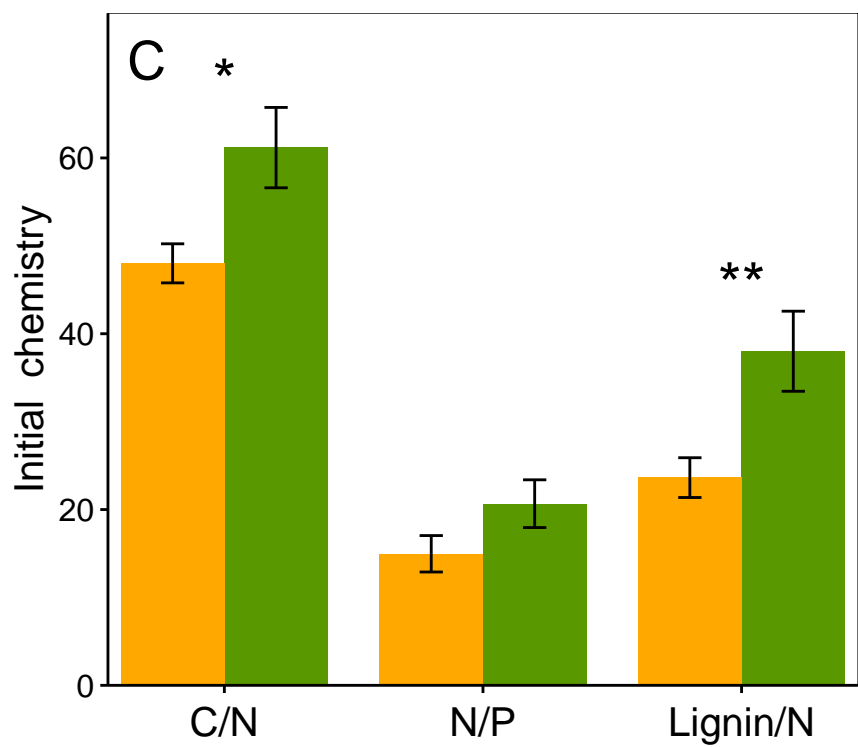

Supplement: supp [file elife-55813-supp-v1.zip › elife_poa_e55813_Figure_4_figure_supplement_2.pdf]

Mesh size

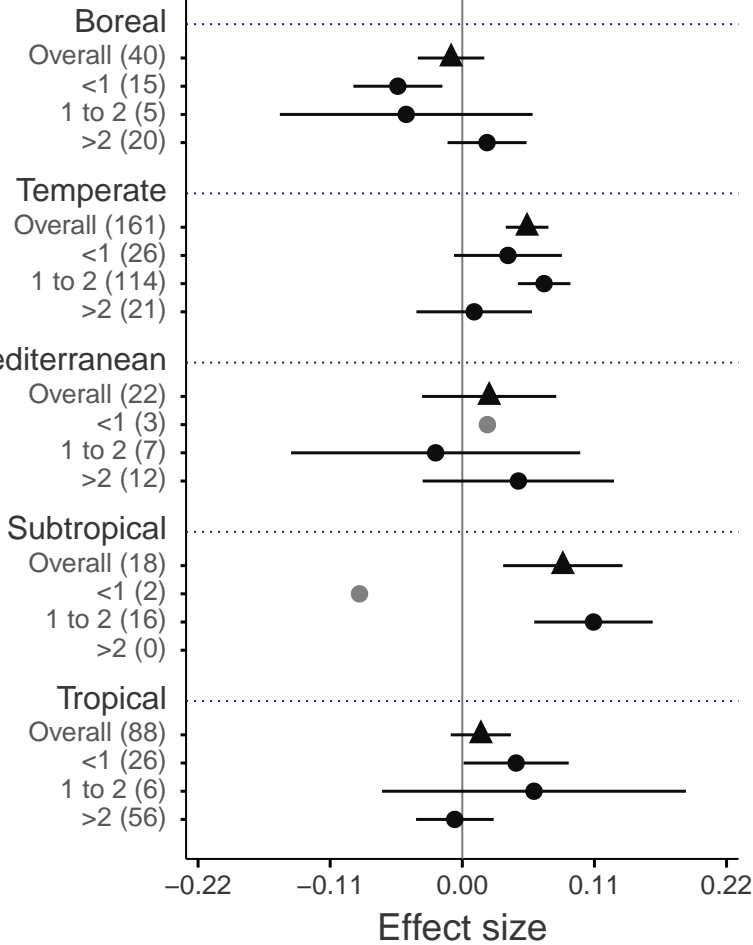

Supplement: supp [file elife-55813-supp-v1.zip › elife_poa_e55813_Figure_5_figure_supplement_1.pdf]
